1 Short title: SINE proteins function in stomatal dynamics

2

3 Author for contact: Iris Meier

4 The Ohio State University, 520 Aronoff Laboratory,

5 Columbus, OH 43210

6 [meier.56@osu.edu](mailto:meier.56@osu.edu), (614) 292 8323

7

8 Article Title: Establishing the role of SINE proteins in regulating stomatal dynamics in

9 *Arabidopsis thaliana*

10

11 Alecia Biel<sup>1</sup>, Morgan Moser<sup>1</sup>, and Iris Meier<sup>1,2,\*</sup>

12

13 <sup>1</sup>Department of Molecular Genetics, The Ohio State University, Columbus, OH, USA

14 <sup>2</sup>Center for RNA Biology, The Ohio State University, Columbus, OH, USA

15 \* Address correspondence to [meier.56@osu.edu](mailto:meier.56@osu.edu)

16

17 Summary: The nuclear-envelope-associated plant KASH proteins SINE1 and SINE2 play a role  
18 in stomatal opening and closing in response to a variety of signals, likely by influencing stomatal  
19 actin dynamics.

20

21 A.B. and I.M. conceived and planned the experiments; A.B. performed and analyzed most of the  
22 experiments. M.M. performed and analyzed the ROS experiment. A.B. and I.M. and wrote the  
23 article with assistance by M.M.; I.M. supervised the project and provided funding.

24

25 The author responsible for distribution of materials integral to the findings presented in this  
26 article in accordance with the policy described in the Instructions for Authors

27 ([www.plantphysiol.org](http://www.plantphysiol.org)) is: Iris Meier ([meier.56@osu.edu](mailto:meier.56@osu.edu))

28

29 Funding: This work was supported by a grant from the National Science Foundation to I.M.  
30 (NSF-1613501).

31

32 **Abstract**

33 Stomatal movement, which regulates gas exchange in plants, is controlled by a variety of  
34 environmental factors, including biotic and abiotic stresses. The stress hormone ABA initiates a  
35 signaling cascade, which leads to increased H<sub>2</sub>O<sub>2</sub> and Ca<sup>2+</sup> levels and F-actin reorganization, but  
36 the mechanism of, and connection between, these events is unclear. SINE1, an outer nuclear  
37 envelope component of a plant Linker of Nucleoskeleton and Cytoskeleton (LINC) complex,  
38 associates with F-actin and is, along with its paralog SINE2, expressed in guard cells. Here, we  
39 have determined that Arabidopsis SINE1 and SINE2 play an important role in stomatal  
40 regulation. We show that SINE1 and SINE2 are required for stomatal opening and closing. Loss  
41 of SINE1 or SINE2 results in ABA hyposensitivity and impaired stomatal dynamics but does not  
42 affect stomatal closure induced by the bacterial elicitor flg22. The ABA-induced stomatal  
43 closure phenotype is, in part, attributed to impairments in Ca<sup>2+</sup> and F-actin regulation. Together,  
44 the data suggest that SINE1 and SINE2 act downstream of ABA but upstream of Ca<sup>2+</sup> and F-  
45 actin. While there is a large degree of functional overlap between the two proteins, there are also  
46 critical differences. Our study makes an unanticipated connection between stomatal regulation  
47 and a novel class of nuclear envelope proteins, and adds two new players to  
48 the increasingly complex system of guard cell regulation.

49

## 50 **Introduction**

51 Eukaryotic nuclei are double membrane-bound organelles with distinct but continuous inner  
52 nuclear membranes (INM) and outer nuclear membranes (ONM). The site where the INM and  
53 ONM meet forms the nuclear pore, where nucleocytoplasmic transport occurs (Jevtić et al.,  
54 2014). The linker of the nucleoskeleton and cytoskeleton (LINC) complexes are protein  
55 complexes spanning the inner and outer nuclear envelope. They contribute to nuclear  
56 morphology, nuclear movement and positioning, chromatin organization and gene expression,  
57 and have been connected to human diseases (Chang et al., 2015; Chang et al., 2015; Lv et al.,  
58 2015). LINC complexes are comprised of Klarsicht/ANC-1/Syne Homology (KASH) ONM  
59 proteins and Sad1/UNC-84 (SUN) INM proteins that interact in the lumen of the nuclear  
60 envelope (NE), thus forming a bridge between the nucleoplasm and the cytoplasm.

61 Opisthokonts (animals and fungi) and plants have homologous SUN proteins with C-terminal  
62 SUN domains located in the NE lumen. However, no proteins with sequence similarity to animal  
63 KASH proteins have been discovered in plants and thus much less is known regarding the role of  
64 plant LINC complexes (Graumann et al., 2010; Oda and Fukuda, 2011). Within the past few  
65 years, studies identifying structurally similar plant KASH protein analogs have caused increased  
66 interest in this area (Graumann et al., 2014; Zhou et al., 2014; Zhou et al., 2015). Arabidopsis  
67 ONM-localized WPP domain-interacting proteins (WIPs) were the first identified plant analogs  
68 of animal KASH proteins, binding the SUN domain of Arabidopsis SUN1 and SUN2 in the NE  
69 lumen (Zhou et al., 2012). WIP1, WIP2, and WIP3 form a complex with WPP-interacting tail-  
70 anchored proteins (WIT1 and WIT2). Together, they are involved in anchoring the Ran GTPase  
71 activating protein RanGAP to the NE (Zhou et al., 2012), in nuclear movement in leaf mesophyll  
72 and epidermal cells and root hairs (Zhou et al., 2012; Tamura et al., 2013; Zhou and Meier, 2013;  
73 Tamura et al., 2015), and in nuclear movement in pollen tubes (Zhou et al., 2015).

74 Based on similarity to the SUN-interacting C-terminal tail domain of WIP1-3, additional plant-  
75 unique KASH proteins were identified and named SUN domain-interacting NE proteins (SINE1-  
76 SINE4 in Arabidopsis) (Zhou et al., 2014). Arabidopsis SINE1 and SINE2 are paralogues and  
77 are conserved among land plants. In leaves, SINE1 is exclusively expressed in guard cells and  
78 the guard cell developmental lineage, whereas SINE2 is expressed in trichomes, epidermal and  
79 mesophyll cells, and only weakly in mature guard cells (Zhou et al., 2014). Both SINE1 and

80 SINE2 are also expressed in seedling roots and share an N-terminal domain with homology to  
81 armadillo (ARM). Proteins encoding ARM repeats have been reported to bind actin and act as a  
82 protein-protein interaction domain in a multitude of proteins across both plant and animal  
83 kingdoms (Coates, 2003). SINE1 was verified to associate with filamentous actin (F-actin) via its  
84 ARM domain through colocalization studies in *N. benthamiana* leaves and Arabidopsis roots but  
85 SINE2 does not share this property. Furthermore, depolymerization of F-actin by LatB disrupts  
86 GFP-SINE1 localization in guard cells and increases GFP-SINE1 mobility during FRAP  
87 analysis, suggesting a SINE1-F-actin interaction in guard cells. Mutant analysis showed that  
88 SINE1 is required for the symmetric, paired localization of nuclei in guard cells, while SINE2  
89 contributes to plant immunity against the oomycete pathogen *Hyaloperonospora arabidopsis*  
90 (Zhou et al., 2014).

91 Stomatal dynamics rely on highly coordinated and controlled influx and efflux of water and ions  
92 which increase turgor pressure to facilitate opening and decrease turgor for stomatal closing.  
93 This process is mediated through complex signal transduction pathways, being controlled by  
94 plant and environmental parameters such as changes in light conditions and abiotic and biotic  
95 stresses (Schroeder et al., 2001). Light changes result in a conditioned stomatal response in  
96 which stomata open and close in a daily cyclic fashion. Abiotic stresses, such as drought, and  
97 biotic stresses, such as pathogen exposure, can both override this daily cycle to induce a specific  
98 stomatal response.

99 The plant hormone abscisic acid (ABA) senses and responds to abiotic stresses, with ABA  
100 metabolic enzymes regulated by changes in drought, salinity, temperature, and light (Zhang et  
101 al., 2008; Xi et al., 2010; Verma et al., 2016). ABA initiates long-term responses, such as growth  
102 regulation, through alterations in gene expression (Kang et al., 2002; Fujita et al., 2005) and  
103 induces stomatal closure as a short-term response to stress, involving the activation of guard cell  
104 anion channels and cytoskeleton reorganization (Eun and Lee, 1997; Zhao et al., 2011; Jiang et  
105 al., 2012; Li et al., 2014). F-actin is radially arrayed in open guard cells of several diverse plant  
106 species and undergoes reorganization into a linear or diffuse bundled array upon stomatal closure  
107 (Kim et al., 1995; Xiao et al., 2004; Li et al., 2014; Zhao et al., 2016). Although many disparate  
108 players have been shown to be important for regulating stomatal dynamics, it is still unclear how  
109 these events are interconnected and where actin reorganization fits in.

110 Here, we have investigated if Arabidopsis SINE1 and SINE2 play a physiological role in guard  
111 cell biology. Our findings show that both SINE1 and SINE2 are required for stomatal opening  
112 and closing. Loss of SINE1 or SINE2 results in ABA hyposensitivity and impaired stomatal  
113 dynamics but does not affect pathogen-induced stomatal closure from the bacterial peptide flg22.  
114 The ABA-induced stomatal closure phenotype is, in part, attributed to impairments in calcium  
115 and actin regulation.

## 116 **Results**

### 117 **SINE1 and SINE2 are involved in light regulation of stomatal opening and closing**

118 To assess whether SINE1 and SINE2 have a function in guard cell dynamics, we first monitored  
119 stomatal aperture changes in *sine1-1*, *sine2-1*, and *sine1-1 sine2-1* double mutants when exposed  
120 to light-dark cycles using *in vivo* stomatal imprints from attached leaves. At the start of the assay,  
121 two hours before lights were turned on, average stomatal apertures were between 2.8  $\mu\text{m}$  and 3.3  
122  $\mu\text{m}$  (Fig. 1A). By mid-day, four hours after the lights were turned on, WT stomata were fully  
123 opened, while *sine1-1* and *sine2-1* mutant stomata had opened only marginally. Expression of  
124 proSINE1:GFP-SINE1 in *sine1-1* (SINE1:*sine1-1*) or proSINE2:GFP-SINE2 in *sine2-1*  
125 (SINE2:*sine2-1*) partially restored stomatal responsiveness to changes in light conditions,  
126 whereas the *sine1-1 sine2-1* double mutant plants displayed intermediate changes in stomatal  
127 dynamics. On average, neither *sine1-1* nor *sine2-1* mutant stomata were fully open or fully  
128 closed for the duration of the assay.

129 To further assess stomatal opening, detached leaves from WT and *sine* mutants (*sine1-1*, *sine2-1*,  
130 and *sine1-1 sine2-1*) were incubated in buffers containing  $\text{Ca}^{2+}$ ,  $\text{K}^+$ ,  $\text{Ca}^{2+}$  and  $\text{K}^+$ , or neither ion  
131 (Fig. 1B). In the absence of external  $\text{K}^+$  and  $\text{Ca}^{2+}$  (opening buffer (OB) base), light-induced  
132 stomatal opening was impaired in *sine1-1*, *sine2-1*, and *sine1-1 sine2-1* (Fig. 1B, top left panel).  
133 With exposure to external  $\text{Ca}^{2+}$  (20  $\mu\text{M}$   $\text{CaCl}_2$ ), *sine1-1*, *sine2-1*, and *sine1-1 sine2-1* still  
134 displayed significantly impaired stomatal opening (Fig. 1B, top right panel). Likewise, with  
135 exposure to external  $\text{K}^+$  (50 mM KCl), statistically significant impairment during opening was  
136 seen in both single and double mutants compared to WT (Fig. 1B, bottom left panel). When  
137 leaves were exposed to both  $\text{Ca}^{2+}$  and  $\text{K}^+$  (OB), stomatal opening in *sine1-1* and *sine2-1* was still  
138 somewhat reduced (Fig. 1B, bottom right panel), however, opening was greatly increased

139 compared to the conditions lacking one or both ions. Similar positive effects of low  
140 concentrations of  $\text{Ca}^{2+}$  on stomatal opening have been previously described (Hao et al., 2012;  
141 Wang et al., 2014). Under these conditions (OB incubation), the double mutant behaved similar  
142 to WT. In all assays, SINE1:*sine1-1* and SINE2:*sine2-1* displayed similar opening to WT,  
143 indicating full rescue of the mutations in these lines. Finally, stomatal closure was assessed after  
144 leaves were either transitioned from 3 hours of light to 3 hours of dark or kept under constant  
145 light. *sine1-1*, *sine2-1*, and *sine1-1 sine2-1* were significantly impaired in closing response,  
146 suggesting that SINE1 and SINE2 are also required for dark-induced stomatal closure (Fig. 1C).  
147 Together, these data indicate that SINE1 and SINE2 are involved in stomatal opening in  
148 response to white light and in closing in response to dark, and that exogenous  $\text{Ca}^{2+}$  and  $\text{K}^{+}$  can at  
149 least partially rescue the opening defect.

#### 150 **Impaired ABA-induced stomatal closure in *sine1-1* and *sine2-1***

151 Abscisic acid (ABA) has been widely used to induce stomatal closure and monitor stomatal  
152 response to simulated abiotic stress (Umezawa et al., 2010) and was used here to test ABA  
153 stomatal response in *sine* mutants. Prior to this assay, we tested stomatal opening for all lines  
154 used here to ensure equal starting conditions for the closing assays (Supplemental Fig. 1).

155 A difference in stomatal aperture was noticed as early as one hour after addition of 20  $\mu\text{M}$  ABA  
156 in all *sine* mutants when compared to WT (Fig. 2A). WT stomata continued to close over the  
157 following two hours, while *sine1-1* (Fig. 2A, left panel), *sine2-1* (Fig. 2A, right panel), and  
158 *sine1-1 sine2-1* (Fig. 2A left and right panel) did not exhibit further stomatal closure. All data in  
159 Fig. 2A were collected at the same time but are split here into two panels for presentation  
160 purposes. WT and *sine1-1 sine2-1* traces are therefore shown twice. In this assay, *sine1-1 sine2-1*  
161 stomatal closure resembled that of *sine1-1* and *sine2-1* single mutants. This suggests that there is  
162 no additive effect of the *sine1-1* and *sine2-1* mutants in this response, indicating that SINE1 and  
163 SINE2 are working in the same pathway. Figure 2B shows representative images of WT and  
164 *sine1-1* stomatal apertures before and after three hours of exposure to ABA.

165 Exogenous ABA induced stomatal closure in SINE1:*sine1-1* and SINE2:*sine2-1* at a similar rate  
166 as in WT (Fig. 2A). To further verify the importance of both SINE1 and SINE2 in ABA-induced  
167 stomatal closure, the following ‘partially’ complemented lines were used: SINE1pro:GFP-SINE1

168 in *sine1-1 sine2-1* (SINE1:*sine1-1 sine2-1*), and SINE2pro:GFP-SINE2 in *sine1-1 sine2-1*  
169 (SINE2:*sine1-1 sine2-1*) (Zhou et al., 2014). Upon ABA exposure, SINE1:*sine1-1 sine2-1* and  
170 SINE2:*sine1-1 sine2-1* showed significantly impaired stomatal closure compared to WT. Hence,  
171 neither SINE1 nor SINE2 alone is sufficient to rescue the *sine1-1 sine2-1* phenotype, confirming  
172 the single and double mutant analysis.

173 In order to verify that this phenotype holds true for multiple alleles, the additional T-DNA  
174 insertion alleles *sine1-3* and *sine2-2* were used to assay single and double mutant lines along  
175 with the SINE1:*sine1-3* and SINE2:*sine2-2* complemented lines and the ‘partially’  
176 complemented lines SINE1:*sine1-3 sine2-1* and SINE2:*sine1-3 sine2-2* (Zhou et al., 2014). The  
177 same ABA-induced stomatal closure assay was performed as seen in Figure 2A and similar  
178 results were obtained, confirming independence of the phenotypes from insertion position and  
179 genetic background (Supplemental Fig. 2). Therefore, only the *sine1-1* and *sine2-1* mutants were  
180 used for the subsequent assays.

181 In addition to inducing stomatal closure, ABA also inhibits stomatal opening (Yin et al., 2013).  
182 To test the role of SINE1 and SINE2 in this process, stomatal opening assays utilizing OB were  
183 performed in the presence of 20  $\mu$ M ABA (Fig. 2C). Under these conditions, WT, SINE1:*sine1-*  
184 *1*, and SINE2:*sine2-1* are unable to open stomata in the presence of ABA. However, stomata of  
185 *sine1-1*, *sine2-1*, and *sine1-1 sine2-1* are unimpeded in their ability to open, indicating that loss  
186 of SINE1 or SINE2 results in impaired stomatal response to ABA for both opening and closing.

187 Stomatal closure can also be induced by biotic stresses, such as pathogen exposure (Zhang et al.,  
188 2008; Guzel Deger et al., 2015). The bacterial elicitor flg22 is a well-studied and accepted tool to  
189 simulate pathogen-induced stomatal closure, and was therefore tested here. As a control, we used  
190 the LRR receptor-like kinase mutant *fls2-1*, which is unable to recognize and bind flg22  
191 (Dunning et al., 2007). After exposure to 5  $\mu$ M flg22, *fls2-1* had significantly inhibited stomatal  
192 closure compared to WT, while flg22-induced stomatal closure in *sine1-1* and *sine2-1* was  
193 similar to that of WT (Fig. 2D). Together, these data indicate that SINE1 and SINE2 are working  
194 within the ABA pathway to regulate ABA-induced stomatal closure and ABA-inhibition of  
195 stomatal opening and that these roles are distinct from the flg22-induced stomatal closure  
196 pathway.



197 **Drought susceptibility is increased in *sine1-1* and *sine2-1* plants after stomatal opening**

198 We next wanted to determine if the impaired stomatal dynamics observed for *sine1-1* and *sine2-1*  
199 are detrimental to plant vitality. If stomata are unable to close in response to stress, it is expected  
200 that an increase in transpiration would occur (Kang et al., 2002; Mustilli et al., 2002). As an  
201 initial investigation into drought susceptibility, we measured weight loss of freshly detached  
202 leaves at midday. Detached leaves were kept in a petri dish and weighed collectively for each  
203 genotype. Fresh weight loss was similar in *sine2-1*, *sine1-1 sine2-1*, SINE1:*sine1-1*, and  
204 SINE2:*sine2-1* compared to WT (Fig. 3A). Although *sine1-1* did show a statistically significant  
205 increase in fresh weight loss compared to WT ( $P<0.05$ ), there was no difference observed  
206 between *sine1-1* and SINE1:*sine1-1*. Thus, despite the stomatal dynamics phenotypes reported  
207 above, there appears to be no conclusive difference in fresh weight loss between WT, *sine1-1*  
208 and *sine2-1* freshly detached leaves. We reasoned that this might be due to the fact that *sine1-1*  
209 and *sine2-1* were impaired both in opening and closing (Fig. 1A), thus likely leading to only  
210 semi-open stomata in the detached leaves of the *sine1-1* and *sine2-1* mutants.

211 To test this hypothesis, we repeated the water loss assay, but incubated leaves for 3 hours in OB  
212 before transferring them to air and monitoring fresh weight loss. As a control, detached leaves of  
213 *sine1-1*, *sine2-1*, and *sine1-1 sine2-1* were exposed to OB base (without calcium or potassium,  
214 Fig. 3B) and similar results were obtained as seen in Figure 3\*: no differences were observed in  
215 leaf fresh weight loss between the tested lines. However, after pre-exposure to OB for three  
216 hours, *sine1-1* and *sine2-1* leaves lost weight at a significantly faster rate than WT while  
217 SINE1:*sine1-1* and SINE2:*sine2-1* lost weight at similar rates as WT and *sine1-1 sine2-1* showed  
218 an intermediate phenotype with no statistically significant difference to WT (Fig. 3C,  $P<0.05$ ).  
219 Leaf morphology of *sine1-1* and *sine2-1* agreed with these observations in that pre-exposure to  
220 OB led to more rapid wilting, as seen by increased leaf curling and shrinking compared to WT  
221 (Fig. 3D).

222 The water loss assay was also repeated with a slightly different experimental setting: First,  
223 individual leaves were placed abaxially side up throughout the assay and weighed separately to  
224 avoid a potential influence of overlapping leaves (Supplemental Fig. S3A-B), and second, an  
225 additional T-DNA allele combination for the double mutant (*sine1-3 sine2-2*) was added to



226 exclude a potential influence of the genetic background. In addition, two lines expressing SINE1  
227 and SINE2 under control of the 35S promoter in a WT background were added: 35S:GFP-SINE1  
228 in WT (SINE1:WT) and 35S:GFP-SINE1 in WT (SINE2:WT). The data from this assay largely  
229 recapitulated those shown in Figure 3, suggesting that the different incubation conditions did not  
230 influence the assay. In addition, both double mutants lost water at an intermediate rate, compared  
231 to WT and the single mutants (Supplemental Fig. S3C), again consistent with the leaf  
232 morphology at the end of the assay (Supplemental Fig. S3B). In combination with the stomatal  
233 opening dynamics phenotypes seen in Figure 1, these data indicate that under the conditions  
234 assayed in Figure 3A, no increased susceptibility to drought was seen, likely because the opening  
235 and closing defects cancel each other out. However, after forced stomatal opening (compare Fig.  
236 1B last panel), increased drought susceptibility was revealed in *sine1-1*, *sine2-1*, and partially in  
237 *sine1-1 sine2-1*, consistent with the altered stomatal dynamics.

### 238 **Mapping the position of SINE1 and SINE2 in the stomatal ABA signaling pathway**

239 Upon ABA perception, a signaling cascade results in the induction of both H<sub>2</sub>O<sub>2</sub> and Ca<sup>2+</sup> (Pei et  
240 al., 2000; Umezawa et al., 2010; Zhao et al., 2011). To narrow down the position of SINE1 and  
241 SINE2 in ABA-induced stomatal closure, we therefore investigated hydrogen peroxide-induced  
242 and calcium-induced stomatal closure. Stomatal closure was measured as described above, in  
243 response to either 0.5 mM H<sub>2</sub>O<sub>2</sub> or 2 mM CaCl<sub>2</sub> (Zhao et al., 2011). Upon exposure to H<sub>2</sub>O<sub>2</sub>,  
244 stomatal closure was impaired in *sine1-1*, *sine2-1* and *sine1-1 sine2-1* compared to WT (Fig. 4A,  
245 4B). SINE1:*sine1-1* and SINE2:*sine2-1* displayed H<sub>2</sub>O<sub>2</sub>-induced stomatal closure similar to WT  
246 (Fig. 4A, 4B). Significantly reduced stomatal closure was seen in SINE1:*sine1-1 sine2-1* and  
247 SINE2:*sine1-1 sine2-1*, again confirming the single and double mutant results (Fig. 4A, 4B).

248 When exposed to a Ca<sup>2+</sup> donor, CaCl<sub>2</sub>, *sine1-1*, *sine2-1*, and *sine1-1 sine2-1* were somewhat  
249 impaired in stomatal closure, which was also observed in the double mutant (Fig. 4C, 4D). (As  
250 above, data shown were obtained at the same time and split for clarification.) However, 2mM  
251 CaCl<sub>2</sub> more effectively triggered stomatal closure in *sine1-1*, *sine2-1*, and *sine1-1 sine2-1* than  
252 the previous treatments of ABA or H<sub>2</sub>O<sub>2</sub> (Supplemental Table S1). These results indicate that  
253 external calcium is able to partially rescue the stomatal closure phenotype. Meanwhile,  
254 SINE1:*sine1-1* and SINE2:*sine2-1* lines showed stomatal closure similar to WT in response to

255 exogenous application of calcium and SINE1:*sine1-1 sine2-1* and SINE2:*sine1-1 sine2-1* had a  
256 similar degree of stomatal closure as single and double *sine* mutants (Fig. 4C, 4D). Together,  
257 these data show that the impaired stomatal closure response of SINE1 and SINE2 mutants can be  
258 partially rescued by Ca<sup>2+</sup>, but not by H<sub>2</sub>O<sub>2</sub>.

259 Within the ABA pathway, there is feedback between the Ca<sup>2+</sup> and H<sub>2</sub>O<sub>2</sub> branches (Pei et al.,  
260 2000; Desikan et al., 2004; Zou et al., 2015). Thus, we also tested the stomatal response of *sine1-*  
261 *1* and *sine2-1* to a combination of both inducers. With exposure to both Ca<sup>2+</sup> and H<sub>2</sub>O<sub>2</sub>, stomatal  
262 closure was similar between *sine2-1*, *sine1-1 sine2-1*, WT, SINE1:*sine1-1*, and SINE2:*sine2-1*  
263 (Fig. 4E). Although the stomata of *sine1-1* mutants were statistically more open compared to WT  
264 (Fig. 4E, P<0.001), this was by a very small difference (3.46μm vs. 3.15μm, respectively).  
265 Finally, ABA-, H<sub>2</sub>O<sub>2</sub>-, Ca<sup>2+</sup>-, and darkness-induced stomatal closure was compared as percent  
266 closure to rule out bias introduced by possibly different apertures at the beginning of each assay  
267 (Supplemental Table S2; see Materials and Methods). This did not lead to any change in the data  
268 interpretation described above.

## 269 **Stomatal overexpression of SINE2 leads to compromised stomatal dynamics**

270 Thus far, loss of either *sine1-1* or *sine2-1* has been shown to compromise stomatal dynamics in a  
271 similar manner. As previously mentioned, SINE1 and SINE2 show different levels of  
272 endogenous protein expression as well as different expression patterns. Thus, we assessed the  
273 impact of ubiquitous expression of these proteins on stomatal opening and closing. 35S:GFP-  
274 SINE1 in WT (SINE1:WT) and 35S:GFP-SINE2 in WT (SINE2:WT), respectively, were  
275 compared to SINE1pro:GFP-SINE1 (SINE1:*sine1-1*) and SINE2pro:GFP-SINE2 (SINE2:*sine2-*  
276 *1*). Confocal microscopy showed that SINE1:WT and SINE1:*sine1-1* have similar expression  
277 levels in guard cells (Fig. 5A, top panels). However, as expected, SINE2:WT showed  
278 significantly higher GFP expression in guard cells than SINE2:*sine2-1*. Indeed, under the assay  
279 conditions, no GFP signal above background was detected in SINE2:*sine2-1* expressing guard  
280 cells (Fig. 5A, bottom panels). (A faint nuclear envelope signal was detectable in SINE2:*sine2-1*  
281 with higher gain and laser settings, see Materials and Methods.) This observation was further  
282 verified by quantifying the nucleus-associated fluorescent signal (Fig. 5B). In contrast,  
283 immunoblots of protein extracts from whole seedlings and rosette leaves of SINE1:WT,

284 SINE2:WT, SINE1:*sine1-1* and SINE2:*sine2-1* showed similar amounts of GFP-fusion protein  
285 (Supplemental Fig. S4). This confirms GFP-SINE2 expression in SINE2:*sine2-1* and indicates  
286 that SINE2:WT leads to overexpression of GFP-SINE2 in guard cells compared to the native  
287 SINE2 promoter.

288 Loss of SINE1 or SINE2 resulted in impairments in stomatal dynamics by both light and dark  
289 (Fig. 1A) and ABA (Fig. 2A). We therefore used these two assays to also test stomatal  
290 impairments in the SINE1 and SINE2 ubiquitously expressing lines. While SINE1:WT behaved  
291 like WT, SINE2:WT recapitulated the *sine1-1* phenotype during a light/dark cycle (Fig. 5C).  
292 Similarly, SINE2:WT was largely unresponsive to ABA, while SINE1:WT showed WT-like  
293 stomatal closure in response to ABA (Fig. 5D). These data suggest that 35S promoter-driven  
294 GFP-SINE1 expression has no significant effect on SINE1/SINE2 function in guard cells.  
295 However, additional expression of the normally lowly expressed SINE2 in guard cells appears  
296 toxic to SINE1/SINE2 function. This suggests that fine-tuning of cellular abundance of the two  
297 proteins is required for their function. Because one model to account for the interference of  
298 SINE2 is that accumulation of a SINE1/SINE2 heterodimer could negatively affect a specific  
299 role of SINE1 in guard cells, we tested if the two proteins can interact in a split-ubiquitin yeast  
300 two-hybrid assay. Indeed, interaction was seen between SINE1 and SINE2 as well as a weaker  
301 interaction between SINE2 and SINE2. Because of self-activation issues, the SINE1-SINE1  
302 interaction could not be tested (Supplemental Fig. S5).

303 Although SINE2:WT recapitulates the *sine1-1* and *sine2-1* phenotype in both a light/dark cycle  
304 and in ABA response, this line showed WT-like loss of fresh weight during desiccation  
305 (Supplemental Fig. S3). This could be explained if SINE2:WT had a compensatory phenotype,  
306 such as altered stomatal density. SINE2 is normally expressed only in mature guard cells  
307 whereas SINE1 is expressed in both progenitor guard cells and mature guard cells (Zhou et al.,  
308 2014). We therefore tested if 35S promoter-driven SINE2 is also influencing stomatal  
309 development (Lucas et al., 2006; Nadeau and Sack, 2002). Indeed, both stomatal index (SI) and  
310 stomatal density (SD) are reduced in SINE2:WT, but not in SINE1:WT, WT, or the T-DNA  
311 insertion mutants, suggesting that a compensatory phenotype might indeed exist (Supplemental  
312 Fig S6).

313 Together, these data show that ubiquitous expression of SINE2 impairs stomatal response to  
314 changes in light conditions as well as during ABA-induced stomatal closure. Additionally,  
315 ubiquitous SINE2 expression resulted in altered stomatal development.

### 316 **Interactions between *sine1-1* and *sine2-1* mutants and the actin cytoskeleton**

317 F-actin rearrangement has been implicated in stomatal dynamics and undergoes a specific pattern  
318 of reorganization (Staiger et al., 2009). When this actin rearrangement is disrupted, there are  
319 concomitant perturbations in stomatal dynamics (Kim et al., 1995; Xiao et al., 2004; Jiang et al.,  
320 2012; Li et al., 2014; Zhao et al., 2016). We tested here if the characterized *sine* mutants showed  
321 interactions with drug-induced F-actin depolymerization or with F-actin stabilization during  
322 stomatal closing. Latrunculin B (LatB) results in F-actin depolymerization and facilitates  
323 stomatal closure when in the presence of ABA (MacRobbie and Kurup, 2007). In contrast,  
324 jasplakinolide (JK) stabilizes and polymerizes F-actin and favors open stomata, inhibiting  
325 stomatal closure (MacRobbie and Kurup, 2007; Li et al., 2014). We used LatB and JK in the  
326 presence and absence of ABA to assess their influence on *sine1-1* and *sine2-1* stomatal closure.

327 When WT leaves are incubated in either OB or OB + LatB in the light, stomatal apertures  
328 remained open during the three-hour assay (Fig. 6A). Similarly, both OB and OB + LatB  
329 exposure resulted in stomata that remained open throughout the assay for *sine1-1* (Fig. 6A, left  
330 panel) and *sine2-1* (Fig. 6A, right panel). ABA alone and ABA + LatB were both able to induce  
331 stomatal closure in WT, as reported previously (MacRobbie and Kurup, 2007; Fig. 6A). ABA  
332 exposure in *sine1-1* and *sine2-1* resulted in minimal closure, as was seen in the previous assays.  
333 However, the combination of ABA and LatB resulted in significant closure of stomata in both  
334 *sine1-1* (Fig. 6A, left panel  $P < 0.001$ ) and *sine2-1* (Fig. 6A, right panel  $P < 0.001$ ), closely  
335 resembling WT. This suggests that LatB treatment overcomes the inhibition of stomatal closure  
336 caused by the loss of either SINE1 or SINE2.

337 Both under OB and OB + JK, stomata remained open in WT (Fig. 6B). JK inhibited ABA-  
338 induced closure in WT, as previously reported, indicating that actin depolymerization is  
339 necessary for ABA-induced stomatal closure (MacRobbie and Kurup, 2007; Li et al., 2014). OB  
340 alone resulted in sustained stomatal opening in *sine1-1* mutants. JK treatment in the absence of  
341 ABA actually led to stomatal closure in *sine1-1* mutants, as did the combination of JK and ABA

342 (Fig. 6B, left panel). In contrast, JK did not induce stomatal closure in *sine2-1* and did not rescue  
343 the *sine2-1* defect in ABA-induced stomatal closure (Fig. 5A, right panel). To account for any  
344 differences seen in starting aperture size, the percent of stomatal closure was calculated  
345 (Supplemental Table S3) and the results are similar to those described above.

346 Together, these data indicate that actin depolymerization rescues the defect in ABA-induced  
347 stomatal closure that is caused by the loss of SINE1 or SINE2 and that, in the absence of SINE1,  
348 JK-induced actin stabilization and polymerization can mimic the effect of ABA.

## 349 **Discussion**

350 We have shown here that the two related plant KASH proteins SINE1 and SINE2 play similar,  
351 yet distinguishable, roles in stomatal dynamics in response to light, dark, and ABA. We have  
352 previously reported that, in leaves, SINE1 is expressed specifically in guard cells and in the  
353 guard cell developmental lineage, while SINE2 is expressed predominantly in leaf epidermal and  
354 mesophyll cells, and only weakly detected in mature guard cells (Zhou et al., 2014). GFP-fusion  
355 proteins of SINE1 and SINE2 decorate the nuclear envelope, as expected based on their  
356 described KASH-protein function, but SINE1 is also detected in guard cells and mature root cells  
357 in a filamentous pattern that resembles actin and can be disassembled by actin-depolymerizing  
358 drugs (Zhou et al., 2014). In *sine1* mutant lines it was observed that the guard cell nuclei, which  
359 are typically arranged opposite each other in the center of the paired guard cells, are shifted from  
360 this position. This cellular phenotype was recapitulated in LatB treated wildtype guard cells,  
361 suggesting actin involvement, but was not found in *sine2* mutants. Based on these cell-biological  
362 data, we had hypothesized a function for SINE1, but not necessarily for SINE2, in guard cell  
363 biology.

364 Interestingly, in most bioassays applied here, *sine1* and *sine2* mutants showed similar guard-cell  
365 related phenotypes, which were also recapitulated by the double mutant, thus suggesting that the  
366 two proteins act in a shared pathway required for wildtype-like guard cell function. Loss of either  
367 SINE1 or SINE2 greatly diminishes stomatal opening in response to light, as well as stomatal  
368 closing in response to dark or ABA and significantly reduces the dynamic range of stomatal  
369 apertures between night and midday (Figs. 1 and 2). The lack of responsiveness to light for  
370 stomatal opening could be compensated in both single and double mutants through addition of

371 external potassium and a low concentration of calcium. Both ions have been shown to play roles  
372 during light-induced stomatal opening (Hao et al., 2012; Wang et al., 2014), thus suggesting that  
373 the mutants might be hyposensitive to the external application of these ions (Fig. 1B).

374 During stomatal closure, ABA acts through  $\text{Ca}^{2+}$ -dependent and  $\text{Ca}^{2+}$ -independent signaling  
375 events (Wang et al., 2013). ABA increases both the  $\text{Ca}^{2+}$  entry at the plasma membrane and the  
376 internal  $\text{Ca}^{2+}$  release resulting in  $\text{Ca}^{2+}$  oscillations (Gilroy et al., 1991; Allen et al., 1999; Grabov  
377 and Blatt, 1999; Hamilton et al., 2000; Schroeder et al., 2001; Jiang et al., 2014; An et al., 2016).  
378 The increase in cellular  $\text{Ca}^{2+}$  is connected to ROS, inasmuch as a mutant of the NADPH oxidase  
379 which impairs ROS production also affects  $\text{Ca}^{2+}$  channel activation by ABA (Kwak et al., 2003).  
380 Conversely, intracellular  $\text{Ca}^{2+}$  activates the NADPH oxidase (Ogasawara et al., 2008), suggesting  
381 a positive feedback loop. This results ultimately in the activation of  $\text{K}^+$  outward channels and  
382 slow and fast ion channels (SLAC/ALMT), as well as the inactivation of  $\text{K}^+$  inward channels  
383 such as KAT1 (Jezek and Blatt, 2017). We therefore tested if application of the ROS  $\text{H}_2\text{O}_2$   
384 and/or  $\text{Ca}^{2+}$  could rescue the *sine* mutant stomatal closure phenotype. While  $\text{H}_2\text{O}_2$  alone had no  
385 or a minimal effect,  $\text{Ca}^{2+}$  partially rescued the impaired stomatal closure and the combination of  
386  $\text{Ca}^{2+}$  and ROS rescued the mutants to wildtype level (Fig. 4). Consistent with this finding,  
387 internal ROS increase after ABA exposure is still occurring in *sine1-1* and *sine2-1*  
388 (Supplemental Fig 7A and B). In contrast, Fura-2 staining suggests that early internal  $\text{Ca}^{2+}$   
389 fluctuations after exposure to ABA are dampened in *sine1-1* and *sine2-1* (Supplemental Fig. 7C  
390 and D). Together, this suggests that, within ABA signaling, SINE1 and SINE2 act upstream of  
391  $\text{Ca}^{2+}$ , and that ROS exposure might intensify the  $\text{Ca}^{2+}$ -based rescue, possibly through the  
392 described effect of ROS on activating the  $\text{Ca}^{2+}$  channels (Kwak et al., 2003; Wang et al., 2013;  
393 Jezek and Blatt, 2017).

394 Mutants with defects in stomatal regulation often show drought susceptibility phenotypes, due to  
395 their inability to fully close stomata and thus lose an excess of water through evaporation (Kang  
396 et al., 2002; Zhao et al., 2016). When we tested potted *sine* single and double mutants for  
397 increased drought susceptibility after withholding watering, or drought recovery defects after re-  
398 watering, we found no significant difference from wildtype plants (data not shown). Similarly,  
399 when detached rosette leaves were exposed to room air and monitored for fresh-weight loss, no  
400 difference from wildtype leaves was observed (Fig. 3A). In light of the results of the light/dark



401 assay (Fig. 1A) as well as the impairment in both light-induced opening and ABA or dark-  
402 induced closing of stomata (Figs. 1B, 1C, and 2A), we argued that mutant plants and detached  
403 mutant leaves might be less subject to evaporation because, on average, stomata neither fully  
404 open nor fully close. This was substantiated by testing evaporation sensitivity after fully opening  
405 stomata by incubation in opening buffer. Now, indeed, mutant leaves wilted more rapidly,  
406 consistent with the observed defects in stomatal closure after this treatment (Fig. 3).

407 When the two lines that constitutively express SINE1 or SINE2 under control of the 35S  
408 promoter were added to this assay (Supplemental Fig. 3), we noted that both lines showed a  
409 fresh-weight loss indistinguishable from wildtype plants. This is not surprising in case of SINE1,  
410 given that this line showed no stomatal defects. Constitutive expression of SINE2, however, led  
411 to defects both in the light/dark assay and during ABA-induced stomatal closure (Fig. 5C and D)  
412 that would be consistent with a *sine*-mutant-like hypersensitivity to evaporation. To assess  
413 whether constitutive expression of SINE2 leads to additional - possibly compensatory -  
414 phenotypes, we calculated stomatal density and stomatal index of fully developed rosette leaves  
415 (Supplemental Fig. S6). Indeed, constitutive SINE2 expression leads to a reduction of both  
416 stomatal density and stomatal index. No such reduction was observed in any other line tested.  
417 The reduced number of stomata might compensate for the closing defects in this line, and thus  
418 result in wild-type-like evaporation within the level of resolution of our assay. Notably, this  
419 unique phenotype suggests that the SINE gene family not only acts in stomatal function but  
420 might also play a role during stomatal development. Only SINE1 is expressed throughout the  
421 guard cell developmental lineage, and mis-expression of SINE2 might thus highlight a yet  
422 unexplored role for SINE1 in the guard-cell developmental program.

423 It was noted that the *sine1-1 sine2-1* stomata respond differently from the *sine1-1* and *sine2-1*  
424 single mutants in the light/dark assay (Fig. 1A), but not in any of the subsequent assays. One  
425 notable difference between the light/dark assay and all other assays is that the former was  
426 performed on potted plants, using leaf imprints, while all other assays used detached leaves  
427 during treatments and epidermal peels for imaging. We thus argued that a whole plant phenotype  
428 might exist specifically in the double mutant that compensates for any stomatal dynamic defects  
429 seen in the light/dark assay. Indeed, we observed abnormalities in root architecture solely in the  
430 double mutant. As SINE1 and SINE2 are highly expressed in the seedling root (Zhou et al.,



431 2014), we investigated primary root (PR) and lateral root (LR) characteristics (Supplemental Fig.  
432 S8). Of the four parameters tested, three showed significant differences in only the *sine1-1 sine2-*  
433 *1* double mutant: decreased PR length, number of LR, and LR density. No differences were  
434 observed in LR length. While it is currently unknown if this root morphology phenotype  
435 accounts for the behavior of the *sine1-1 sine2-1* mutant in the light/dark assay, these data  
436 demonstrate that the possibility of additional phenotypes unique to the double mutant have to be  
437 taken into account when interpreting these data.

438 Significantly less is known about the signal transduction pathway that triggers stomatal closure  
439 after exposure to dark. It is generally assumed, however, that many steps are shared with the  
440 ABA pathway (Jezek and Blatt, 2017). For example, mutants in the PYR/PYL/RCAR ABA  
441 receptors are also deficient in their stomatal response to darkness (Merilo et al., 2013). Similarly,  
442 diurnal rhythmicity is closely linked to the increase of guard cell ABA during the night - based  
443 both on de novo synthesis and import from the apoplast - and depletion of ABA levels during the  
444 day (Daszkowska-Golec and Szarejko, 2013). Together, these known connections are all  
445 consistent with the *sine* mutant phenotypes observed here, and suggest a primary role for SINE1  
446 and SINE2 in a step downstream of ABA, but upstream of calcium, and downstream of some  
447 aspect of ROS enhancement of calcium-mediated guard cell closure.

448 A plethora of known effects of actin dynamics on stomatal aperture regulation (Kim et al., 1995;  
449 Gao et al., 2008; Gao et al., 2009; Higaki et al. 2010; Eun et al., 2001; MacRobbie and Kurup,  
450 2007; Lemichez et al., 2001; Jiang et al., 2012; Li et al., 2014; Zhao et al., 2011), together with  
451 SINE1's association with F-actin in guard cells made us speculate whether the *sine* mutant  
452 phenotypes are related to disturbances in guard cell actin dynamics. It has been shown previously  
453 that the inhibitor of F-actin assembly, latrunculin B (LatB) and the F-actin stabilizer,  
454 jaspakinolide (JK) have opposite effects on ABA-based stomatal closure (MacRobbie and  
455 Kurup, 2007). While LatB mildly enhanced closure in the presence of ABA, JK inhibited it. Our  
456 data recapitulate in *Arabidopsis* these effects reported for *Commelina communis* (MacRobbie  
457 and Kurup, 2007). Both *sine1* and *sine2* mutant phenotypes showed a clear interaction with the  
458 actin drugs. While loss of either SINE1 or SINE2 inhibited ABA-induced closure, co-incubation  
459 with LatB rescued this inhibition to a large degree (Fig. 6A). A hypothesis consistent with this  
460 finding is that SINE1 and SINE2 are connected to actin turnover during the transition from radial

461 to longitudinal arrays that accompanies stomatal closure. In the presence of LatB, this activity  
462 would not be required. JK inhibited guard cell closure in both wildtype and the *sine2-1* mutant,  
463 consistent with the assumption that actin de-polymerization is a required step. Surprisingly  
464 however, JK alone, in the absence of ABA, was able to trigger stomatal closure in the *sine1-1*  
465 mutant (Fig. 6B). One scenario to explain this finding is that SINE1 might be required for an  
466 additional step involved in stabilizing F-actin, downstream of ABA, and that this step is also  
467 required for closing. In wildtype guard cells, this would be accomplished through an ABA-  
468 triggered involvement of SINE1, and JK has therefore no further effect. However, this step  
469 would be inhibited in the absence of SINE1, and could thus be rescued by JK alone, mimicking  
470 the ABA response. Clearly, more studies will be required to verify these proposed actin-related  
471 functionalities of the two proteins, but the data already show (1) that there is indeed an  
472 interaction between SINE1/2 function and actin worth further investigating, and (2) that while  
473 SINE1 and SINE2 have many overlapping functions, there are also critical differences, as  
474 revealed by the JK data. Future studies will have to focus on the real-time analysis of actin  
475 dynamics in the different mutant backgrounds and under the different treatments and the  
476 investigation of genetic interactions between *sine* mutants and the reported mutants of actin-  
477 modulating proteins involved in guard cell regulation.

478 Together, we have shown that the two plant KASH proteins SINE1 and SINE2 function in  
479 stomatal aperture regulation in a variety of scenarios that involve light, dark, and ABA. We  
480 propose that they act downstream of ABA, and upstream of calcium and actin. While there is a  
481 large degree of functional overlap between the two proteins, there are also critical differences,  
482 and their further analysis might shed light on the role of their intriguingly different expression  
483 patterns. This study reveals an unanticipated connection between stomatal regulation and a class  
484 of nuclear envelope proteins known to be involved in nuclear anchoring and positioning, and  
485 adds two novel players to the ever more complex world of guard cell biology (Albert et al.,  
486 2017). Addressing the connection between the phenotypes described here and the cellular role of  
487 SINE1 in guard cell nuclear positioning will likely be one of the more groundbreaking avenues  
488 of further study.

## 489 **Materials and methods**

## 490 **Plant material**

491 *Arabidopsis thaliana* (ecotype Col-0) was grown at 25°C in soil under 8-h light and 16-h dark  
492 conditions. For all assays, leaves were collected from 6-8 week-old *Arabidopsis* plants grown  
493 under these conditions. The *fls2-1* mutant has been reported previously (Uddin et al., 2017).  
494 *sine1-1* (SALK\_018239C), *sine2-1* (CS801355), and *sine2-2* (CS1006876) were obtained from  
495 the *Arabidopsis* Biological Resource Center while *sine1-3* (GK-485E08-019738) was obtained  
496 from GABI-Kat. All SINE1 and SINE2 lines used here were previously reported (Zhou et al.,  
497 2014).

## 498 **Stomatal aperture measurements**

499 Stomatal bioassays were performed by detaching the youngest, fully expanded rosette leaves of  
500 6-8 week-old plants grown under short-day conditions (8 hours light; 16 hours dark).

501 For the light/dark assay, Duro super glue (Duro, item #1400336) was applied to a glass slide and  
502 the abaxial side of a leaf was pressed into the glue to create an imprint. Imprints were taken two  
503 hours prior to the chamber lights turning on and every two hours until two hours after the lights  
504 were turned off. The imprints were allowed to dry and subsequently imaged to obtain stomatal  
505 aperture measurements.

506 All other stomatal assays involved placing leaves in a petri dish abaxial side up with opening  
507 buffer (OB) containing 10 mM MES, 20  $\mu$ M CaCl<sub>2</sub>, 50 mM KCl, and 1% sucrose at pH 6.15 for  
508 3 h under constant light, leaves remained whole until designated time points at which abaxial  
509 epidermal strips were carefully peeled and imaged using a confocal microscope (An et al., 2016;  
510 Eclipse C90i; Nikon). For some of the experiments, OB base containing 10 mM MES and 1%  
511 sucrose at pH 6.15 was used to test stomatal dynamics with and without addition of 20  $\mu$ M CaCl<sub>2</sub>  
512 and/or 50 mM KCl. Stomatal closing assays were performed immediately after the opening  
513 assays, in which leaves were transferred to closing buffer containing 10 mM MES at pH 6.15  
514 with or without the following treatments, as indicated: 20  $\mu$ M ABA, 2 mM CaCl<sub>2</sub>, 0.5 mM H<sub>2</sub>O<sub>2</sub>,  
515 or 5  $\mu$ M flg22 (Kang et al., 2002; Zhang et al., 2008b; Zhao et al., 2011). Leaves were placed in  
516 darkness to induce stomatal closure for 3 h when mentioned. NIS-Elements software was used  
517 for stomatal aperture measurements.

## 518 **Transpiration assay**

519 To monitor water loss, five to six fully expanded leaves were detached from each plant at similar  
520 developmental stages (sixth to ninth true rosette leaves). For the “air only” assay, leaves were  
521 placed adaxial side up in an open petri dish under constant light on a laboratory bench and leaf  
522 weights were recorded every 30 minutes (Kang et al., 2002). For all other assays in Fig. 2, leaves  
523 were placed adaxial side up in either OB, OB base, OB base with 20  $\mu$ M CaCl<sub>2</sub>, or OB base with  
524 50 mM KCl for 3 h to induce opening. Leaves were then dried briefly on “Kim wipes” and  
525 placed adaxial side up in dry petri dishes for an additional 3 h under constant light. Leaf weights  
526 were recorded every 30 minutes. For the transpiration assay in Supplemental Fig. 2, leaves were  
527 placed abaxial side up in OB and then kept abaxial side up throughout the duration of the assay  
528 on paper towels. Leaves were weighed individually.

## 529 **Confocal microscopy and fluorescence intensity measurements**

530 For the imaging and quantification shown in Figs. 5A and 5B, 6-8 week-old Arabidopsis leaves  
531 were imaged using a confocal microscope (Eclipse C90i; Nikon). Image settings were  
532 established first for the highest expressing line (35S:GFP-SINE1 in WT), to obtain a clearly  
533 visible, but not overexposed, GFP fluorescence signal at the nuclear envelope. These settings  
534 were then applied for imaging all other samples: a medium pinhole with a gain setting of 7.35  
535 and the 488-nm laser set at 15% power. All images were taken at room temperature with a Plan  
536 Flour 40x oil objective (numerical aperture of 1.3, Nikon). NIS-Elements software was used to  
537 quantify fluorescence by drawing a region of interest around individual guard cell nuclei.

## 538 **ROS and calcium production assays**

539 Detection of ROS in stomata was performed as described previously (Li et al. 2014). Whole  
540 leaves were incubated in OB adaxial side up for 3h under constant light. Leaves with open  
541 stomata were incubated in MES buffer pH 6.15 containing 50  $\mu$ M of H<sub>2</sub>DCF-DA in the dark for  
542 15 min and then washed with water. The leaves were then transferred to CB containing 20  $\mu$ M  
543 ABA for 15, 30, 60 or 120 min. At the indicated time points, abaxial epidermal strips were  
544 peeled from the leaves for ROS detection by confocal microscopy with a setting of 488 nm

545 excitation and 525 nm emission. The experiments were repeated four times with at least 70  
546 stomata for each time point.

547 Detection of Ca<sup>2+</sup> in stomata was performed using the Fura-2 AM dye (Sigma Aldrich, CAS  
548 108964-32-5) (Jiang et al., 2014). Epidermal peels were floated in 10mM MES-TRIS (pH 6.1)  
549 buffer containing 1 μM Fura-2 AM and kept at 4°C in the dark for two hours. The Fura-2 dye  
550 was then washed out and peels were placed back in opening buffer for one hour at RT. ABA was  
551 added and time-lapse imaging of stomata was performed using confocal microscopy at specified  
552 time intervals.

### 553 **Immunoblotting**

554 *N. benthamiana* leaves were collected and ground in liquid nitrogen into powder, and protein  
555 extractions were performed at 4°C. 1 ml radioimmunoprecipitation (RIPA) buffer was used to  
556 extract 500 μl of plant tissue, as described previously (Zhou et al., 2014). After three washes in  
557 RIPA buffer, samples were separated using 10% SDS-PAGE, transferred to polyvinylidene  
558 difluoride membranes (Bio-Rad Laboratories), and detected with a mouse anti-GFP (1:2000;  
559 632569; Takara Bio Inc.) or a mouse anti-tubulin (1:2000; 078K4842; Sigma-Aldrich) antibody.  
560 Membranes were imaged using an Odyssey Clx Imaging system and fluorescence was quantified  
561 using Image Studio software (LI-COR, inc).

### 562 **Yeast Strains and Manipulations**

563 All work with yeast was done using *Saccharomyces cerevisiae* strain NMY51:MATahis3D200  
564 trp1-901 leu2-3,112 ade2 LYS2::(lexAop)4-HIS3 ura3::(lexAop)8-lacZ ade2::(lexAop)8-ADE2  
565 GAL4 obtained from the DUAL membrane starter kit N (P01201-P01229). Yeast cells were  
566 grown using standard microbial techniques and media (Lentze and Auerbach, 2008). Media  
567 designations are as follows: YPAD is Yeast Extract plus Adenine medium, Peptone, and  
568 Glucose; SD is Synthetic Defined dropout (SD-drop-out) medium. Minimal dropout media are  
569 designated by the constituent that is omitted (e.g. -leu -trp -his -ade medium lacks leucine,  
570 tryptophan, histidine, and adenine). Recombinant plasmid DNA constructs were introduced into  
571 NMY51 by LiOAc-mediated transformation as described (Gietz and Schiestl, 2007).

### 572 **Statistics**

573 The number of stomata analyzed for each line, in all figures, is  $\geq 80$ , unless otherwise stated.  
574 Error bars represent the standard deviation of means. Asterisks or symbols denote statistical  
575 significance after Student's t-test as indicated.

576

## 577 **Supplemental Material**

578 The following materials are available in the online version of this article.

579 **Supplemental Figure 1.** Stomatal opening in *sine* mutants prior to exogenous application of  
580 ABA.

581 **Supplemental Figure 2.** Stomatal closure in response to ABA for *sine1-3* and *sine2-2* mutants.

582 **Supplemental Figure 3.** Transpiration rates of individual leaves after induced stomatal opening.

583 **Supplemental Figure 4.** Protein blot analysis of transgenic Arabidopsis plants expressing GFP-  
584 SINE1 and GFP-SINE2.

585 **Supplemental Figure 5.** Interactions between SINE1 and SINE2 proteins in the membrane yeast  
586 two-hybrid system.

587 **Supplemental Figure 6.** Stomatal density and stomatal index of fully developed rosette leaves.

588 **Supplemental Figure 7.** ROS production and calcium monitoring in *sine* mutants.

589 **Supplemental Figure 8.** Root morphology of *sine* mutants.

590 **Supplemental Table S1.** Comparison of stomatal closure assays.

591 **Supplemental Table S2.** Percent stomatal closure for ABA and light-dark assays.

592 **Supplemental Table S3.** Percent stomatal closure for cytoskeleton drug treatment assays.

593

594

595 **Acknowledgements**

596 This work was funded by a National Science Foundation grant to I.M. (NSF-1613501). We are  
597 grateful to Dr. Sarah Assmann (Penn State University) for critical reading of the first version of  
598 this manuscript. We would like to thank Andrew Kirkpatrick and all members of the Meier lab  
599 for many fruitful discussions throughout this work. We thank Dr. Xiao Zhou (Caribou  
600 Biosciences) for constructing the 35S-driven SINE1 and SINE2 expressing Arabidopsis lines  
601 while working in the Meier lab and Dr. David Mackey (OSU) for the *fls2-1* mutant.

602



603 **Figure legends:**

604 **Figure 1: Determining the role of SINE1 and SINE2 in the light regulation of stomatal**

605 **dynamics.** (A) Stomatal imprints from intact whole Arabidopsis leaves were taken and stomatal  
606 apertures were measured 2 h prior to the onset of lights (yellow bar) and every 2 h thereafter  
607 until 2 h after lights off (black bar). Symbols denote statistical significance, with  $P < 0.001$ . \*: WT  
608 vs. all other lines; †: *sine1-1* vs. WT, SINE1:*sine1-1*, and *sine1-1 sine2-1*; ¥: *sine2-1* vs. WT,  
609 SINE2:*sine2-1*, and *sine1-1 sine2-1*; (B) Whole leaves were placed in specified buffer for 3 h  
610 under constant light at the end of a night cycle, epidermal peels were mounted every 90 min, and  
611 stomatal apertures were measured. Top-left: opening buffer (OB) base (see methods); Top-right:  
612 OB base plus 10  $\mu\text{M}$   $\text{CaCl}_2$ ; Bottom-left: OB base plus 20 mM KCl; Bottom-right: OB base plus  
613 10  $\mu\text{M}$   $\text{CaCl}_2$  and 20 mM KCl. Symbols denote statistical significance, with  $P < 0.001$ . \*:  
614 specified lines vs WT; †: specified lines vs. SINE1:*sine1-1*; ¥: specified lines vs. SINE2:*sine2-1*;  
615 (C) Whole leaves were placed in OB under constant light for 3 h and either kept under constant  
616 light or placed in dark for an additional 3 h. Epidermal peels were taken and stomatal apertures  
617 were measured every 90 min after the initial 3 h stomatal opening phase. Symbols denote  
618 statistical significance as determined by Student's t-test, with  $P < 0.001$ . \*: dark WT vs light WT;  
619 †: dark *sine2-1* vs light *sine2-1*. All data are mean values  $\pm$  SE from three independent  
620 experiments.

621 **Figure 2: Abiotic vs. biotic stress induced stomatal changes in sine mutants.** Stomatal

622 opening and closing assays were used here as described in methods. (A) leaves incubated in 20  
623  $\mu\text{M}$  ABA during closure; Data obtained from one experiment and split into two panels for clarity  
624 (B) Representative images of stomata for WT and *sine1-1* lines before and after ABA exposure.  
625 (C) leaves were incubated in OB plus 20  $\mu\text{M}$  ABA during stomatal opening. (D) leaves  
626 incubated in 5  $\mu\text{M}$  flg22 during closure. All data are mean values  $\pm$  SE from three independent  
627 experiments. Symbols denote statistical significance as determined by Student's t-test, with  
628  $P < 0.001$ . \*: specified lines vs. WT; †: specified lines vs. SINE1:*sine1-1*; ¥: specified lines vs.  
629 SINE2:*sine2-1*.

630 **Figure 3: Transpiration rates after induced stomatal opening.** Rosette leaves were taken

631 from 6-8 week old short day plants at similar developmental stages for each of the lines depicted

632 and kept abaxial side up. Fresh leaves were placed in specified buffer for 3 hours under constant  
633 light, transferred to a petri dish as specified below, and weighed every 30 minutes thereafter. (A)  
634 in air; (B) in opening buffer (OB) base; (C) in OB with representative images shown in (D)  
635 where the top images are leaves at 0 minutes before OB incubation and bottom images are leaves  
636 after 180 min OB incubation. Mean values  $\pm$  SE from at least three independent experiments are  
637 shown in A-C. (B) shows no statistically significant differences. Symbols in (A) and (C) denote  
638 the beginning of statistically significant differences as determined by Student's t-test, with  
639  $P < 0.05$ . \*: *sine1-1* vs. WT; †: *sine2-1* vs. WT; ¥: *sine2-1* vs. SINE2:*sine2-1*; d: *sine1-1* vs.  
640 SINE1:*sine1-1*.

641 **Figure 4: Stomatal closure in response to H<sub>2</sub>O<sub>2</sub> and CaCl<sub>2</sub> for SINE1 and SINE2 mutants.**

642 Stomatal opening and closing assays were used here as described in methods. (A-B) leaves  
643 incubated in 0.5 mM H<sub>2</sub>O<sub>2</sub> during closure; Data obtained from one experiment and split into two  
644 panels for clarity (C-D) leaves incubated in 2 mM CaCl<sub>2</sub> during closure; Data obtained from one  
645 experiment and split into two panels for clarity. (E) leaves incubated in 0.5 mM H<sub>2</sub>O<sub>2</sub> plus 2 mM  
646 CaCl<sub>2</sub> during closure; All data are mean values  $\pm$  SE from three independent experiments.  
647 Symbols denote statistical significance as determined by Student's t-test, with  $P < 0.001$ . \*:  
648 specified lines vs. WT; †: specified lines vs. GFP-SINE1:*sine1-1*; ¥: specified lines vs. GFP-  
649 SINE2:*sine2-1*.

650 **Figure 5: SINE2 but not SINE1 overexpression leads to compromised stomatal dynamics.**

651 (A) Confocal microscopy was used to take images of plants expressing GFP-tagged SINE1 or  
652 SINE2, with representative images shown. Gain was set to first image of top row and used for  
653 the remaining images. Scale bar represents 10  $\mu$ m. (B) Data taken from two plants.  $\geq 50$  nuclei  
654 were measured for each line. Nuclear fluorescence intensities were measured using ImageJ.  
655 SINE2:*sine2-1* had no measurable fluorescence signal at the nucleus and was therefore not  
656 quantified. Symbols denote statistical significance as determined by Student's t-test. \*:  $P < 0.005$ ,  
657 SINE2:WT vs. SINE1:*sine1-1*. (C) Stomatal apertures taken from stomatal imprint assay at the  
658 start and end of light cycles. \*:  $P < 0.001$ , specified lines vs. WT; †:  $P = 0.004$ , specified lines vs.  
659 WT. (D) ABA induced stomatal closure assay as described in methods. \*:  $P < 0.001$ , specified  
660 lines vs. WT, SINE1:*sine1-1*, SINE1:WT, and SINE2:*sine2-1*. Data shown in (C) and (D) are

661 from three independent experiments. Data are mean values  $\pm$  SE. Symbols denote statistical  
662 significance.

663 **Figure 6: Disrupting actin dynamics in *sine1-1* and *sine2-1* mutant lines alters stomatal**  
664 **closure.** Stomatal closure was monitored over a 3 h incubation time in the presence and absence  
665 of ABA and actin disrupting drugs. (A) Buffers with and without 20  $\mu$ M ABA and 10  $\mu$ M of the  
666 F-actin depolymerizing drug latrunculin B (LatB); Left: WT and *sine1-1*; Right: WT and *sine2-1*.  
667 Symbols denote statistical significance as determined by Student's t-test, with  $P < 0.001$ . \*: *sine1-*  
668 *1*, ABA+LatB vs. *sine1-1*, ABA only; †: *sine2-1*, ABA+LatB vs. *sine2-1*, ABA only. (B) Buffers  
669 with and without 20  $\mu$ M ABA and 10  $\mu$ M of the F-actin stabilizing drug jasplakinolide (JK);  
670 Left: WT and *sine1-1*; Right: WT and *sine2-1*.  $P < 0.001$ . \*: specified lines vs. *sine1-1*, ABA  
671 only; †: *sine1-1*, JK only vs. WT, JK only; ‡: *sine1-1*, ABA+JK vs. WT, ABA+JK. All data are  
672 mean values  $\pm$  SE from three independent experiments.

673

#### 674 **References:**

- 675 **Albert R, Acharya BR, Jeon BW, Zañudo JGT, Zhu M, Osman K, Assmann SM** (2017) A  
676 new discrete dynamic model of ABA-induced stomatal closure predicts key feedback  
677 loops. *PLoS Biol* **15**: e2003451
- 678 **Allen GJ, Kuchitsu K, Chu SP, Murata Y, Schroeder JI** (1999) Arabidopsis *abi1-1* and *abi2-*  
679 *1* phosphatase mutations reduce abscisic acid-induced cytoplasmic calcium rises in guard  
680 cells. *Plant Cell* **11**: 1785-1798
- 681 **An Y, Liu L, Chen L, Wang L** (2016) ALA Inhibits ABA-induced Stomatal Closure via  
682 Reducing H<sub>2</sub>O<sub>2</sub> and Ca(2+) Levels in Guard Cells. *Front Plant Sci* **7**: 482
- 683 **Chang W, Antoku S, Östlund C, Worman HJ, Gundersen GG** (2015) Linker of  
684 nucleoskeleton and cytoskeleton (LINC) complex-mediated actin-dependent nuclear  
685 positioning orients centrosomes in migrating myoblasts. *Nucleus* **6**: 77-88
- 686 **Chang W, Worman HJ, Gundersen GG** (2015) Accessorizing and anchoring the LINC  
687 complex for multifunctionality. *J Cell Biol* **208**: 11-22
- 688 **Coates JC** (2003) Armadillo repeat proteins: beyond the animal kingdom. *Trends Cell Biol* **13**:  
689 463-471
- 690 **Daszkowska-Golec A, Szarejko I** (2013) Open or close the gate - stomata action under the  
691 control of phytohormones in drought stress conditions. *Front Plant Sci* **4**: 138
- 692 **Desikan R, Cheung MK, Bright J, Henson D, Hancock JT, Neill SJ** (2004) ABA, hydrogen  
693 peroxide and nitric oxide signalling in stomatal guard cells. *J Exp Bot* **55**: 205-212
- 694 **Dunning FM, Sun W, Jansen KL, Helft L, Bent AF** (2007) Identification and mutational  
695 analysis of Arabidopsis FLS2 leucine-rich repeat domain residues that contribute to  
696 flagellin perception. *Plant Cell* **19**: 3297-3313

- 697 **Eun SO, Lee Y** (1997) Actin filaments of guard cells are reorganized in response to light and  
698 abscisic acid. *Plant Physiol* **115**: 1491-1498
- 699 **Fujita Y, Fujita M, Satoh R, Maruyama K, Parvez MM, Seki M, Hiratsu K, Ohme-Takagi**  
700 **M, Shinozaki K, Yamaguchi-Shinozaki K** (2005) AREB1 is a transcription activator of  
701 novel ABRE-dependent ABA signaling that enhances drought stress tolerance in  
702 Arabidopsis. *Plant Cell* **17**: 3470-3488
- 703 **Gietz RD, Schiestl RH** (2007) High-efficiency yeast transformation using the LiAc/SS carrier  
704 DNA/PEG method. *Nat Protoc* **2**: 31-34
- 705 **Gilroy S, Fricker MD, Read ND, Trewavas AJ** (1991) Role of Calcium in Signal Transduction  
706 of Commelina Guard Cells. *Plant Cell* **3**: 333-344
- 707 **Grabov A, Blatt MR** (1999) A steep dependence of inward-rectifying potassium channels on  
708 cytosolic free calcium concentration increase evoked by hyperpolarization in guard cells.  
709 *Plant Physiol* **119**: 277-288
- 710 **Graumann K, Runions J, Evans DE** (2010) Characterization of SUN-domain proteins at the  
711 higher plant nuclear envelope. *Plant Journal* **61**: 134-144
- 712 **Graumann K, Vanrobays E, Tutois S, Probst AV, Evans DE, Tatout C** (2014)  
713 Characterization of two distinct subfamilies of SUN-domain proteins in Arabidopsis and  
714 their interactions with the novel KASH-domain protein AtTIK. *J Exp Bot* **65**: 6499-6512
- 715 **Guzel Deger A, Scherzer S, Nuhkat M, Kedzierska J, Kollist H, Brosché M, Unyayar S,**  
716 **Boudsoq M, Hedrich R, Roelfsema MR** (2015) Guard cell SLAC1-type anion  
717 channels mediate flagellin-induced stomatal closure. *New Phytol* **208**: 162-173
- 718 **Hamilton DW, Hills A, Kohler B, Blatt MR** (2000) Ca<sup>2+</sup> channels at the plasma membrane of  
719 stomatal guard cells are activated by hyperpolarization and abscisic acid. *Proc Natl Acad*  
720 *Sci U S A* **97**: 4967-4972
- 721 **Hao LH, Wang WX, Chen C, Wang YF, Liu T, Li X, Shang ZL** (2012) Extracellular ATP  
722 promotes stomatal opening of Arabidopsis thaliana through heterotrimeric G protein  $\alpha$   
723 subunit and reactive oxygen species. *Mol Plant* **5**: 852-864
- 724 **Jevtić P, Edens LJ, Vuković LD, Levy DL** (2014) Sizing and shaping the nucleus: mechanisms  
725 and significance. *Curr Opin Cell Biol* **28**: 16-27
- 726 **Jezek M, Blatt MR** (2017) The Membrane Transport System of the Guard Cell and Its  
727 Integration for Stomatal Dynamics. *Plant Physiol* **174**: 487-519
- 728 **Jiang K, Sorefan K, Deeks MJ, Bevan MW, Hussey PJ, Hetherington AM** (2012) The  
729 ARP2/3 complex mediates guard cell actin reorganization and stomatal movement in  
730 Arabidopsis. *Plant Cell* **24**: 2031-2040
- 731 **Jiang Y, Wu K, Lin F, Qu Y, Liu X, Zhang Q** (2014) Phosphatidic acid integrates calcium  
732 signaling and microtubule dynamics into regulating ABA-induced stomatal closure in  
733 Arabidopsis. *Planta* **239**: 565-575
- 734 **Kang JY, Choi HI, Im MY, Kim SY** (2002) Arabidopsis basic leucine zipper proteins that  
735 mediate stress-responsive abscisic acid signaling. *Plant Cell* **14**: 343-357
- 736 **Kim M, Hepler PK, Eun SO, Ha KS, Lee Y** (1995) Actin Filaments in Mature Guard Cells Are  
737 Radially Distributed and Involved in Stomatal Movement. *Plant Physiol* **109**: 1077-1084
- 738 **Kwak JM, Mori IC, Pei ZM, Leonhardt N, Torres MA, Dangl JL, Bloom RE, Bodde S,**  
739 **Jones JD, Schroeder JI** (2003) NADPH oxidase AtrbohD and AtrbohF genes function  
740 in ROS-dependent ABA signaling in Arabidopsis. *EMBO J* **22**: 2623-2633
- 741 **Lentze N, Auerbach D** (2008) Membrane-based yeast two-hybrid system to detect protein  
742 interactions. *Curr Protoc Protein Sci* **Chapter 19**: Unit 19.17

- 743 **Li X, Li JH, Wang W, Chen NZ, Ma TS, Xi YN, Zhang XL, Lin HF, Bai Y, Huang SJ,**  
744 **Chen YL** (2014) ARP2/3 complex-mediated actin dynamics is required for hydrogen  
745 peroxide-induced stomatal closure in Arabidopsis. *Plant Cell Environ* **37**: 1548-1560
- 746 **Lv XB, Liu L, Cheng C, Yu B, Xiong L, Hu K, Tang J, Zeng L, Sang Y** (2015) SUN2 exerts  
747 tumor suppressor functions by suppressing the Warburg effect in lung cancer. *Sci Rep* **5**:  
748 17940
- 749 **MacRobbie EA, Kurup S** (2007) Signalling mechanisms in the regulation of vacuolar ion  
750 release in guard cells. *New Phytol* **175**: 630-640
- 751 **Merilo E, Laanemets K, Hu H, Xue S, Jakobson L, Tulva I, Gonzalez-Guzman M,**  
752 **Rodriguez PL, Schroeder JI, Brosché M, Kollist H** (2013) PYR/RCAR receptors  
753 contribute to ozone-, reduced air humidity-, darkness-, and CO<sub>2</sub>-induced stomatal  
754 regulation. *Plant Physiol* **162**: 1652-1668
- 755 **Mustilli AC, Merlot S, Vavasseur A, Fenzi F, Giraudat J** (2002) Arabidopsis OST1 protein  
756 kinase mediates the regulation of stomatal aperture by abscisic acid and acts upstream of  
757 reactive oxygen species production. *Plant Cell* **14**: 3089-3099
- 758 **Oda Y, Fukuda H** (2011) Dynamics of Arabidopsis SUN proteins during mitosis and their  
759 involvement in nuclear shaping. *Plant J* **66**: 629-641
- 760 **Ogasawara Y, Kaya H, Hiraoka G, Yumoto F, Kimura S, Kadota Y, Hishinuma H, Senzaki**  
761 **E, Yamagoe S, Nagata K, Nara M, Suzuki K, Tanokura M, Kuchitsu K** (2008)  
762 Synergistic activation of the Arabidopsis NADPH oxidase AtrbohD by Ca<sup>2+</sup> and  
763 phosphorylation. *J Biol Chem* **283**: 8885-8892
- 764 **Pei ZM, Murata Y, Benning G, Thomine S, Klüsener B, Allen GJ, Grill E, Schroeder JI**  
765 (2000) Calcium channels activated by hydrogen peroxide mediate abscisic acid signalling  
766 in guard cells. *Nature* **406**: 731-734
- 767 **Schroeder JI, Allen GJ, Hugouvieux V, Kwak JM, Waner D** (2001) GUARD CELL  
768 SIGNAL TRANSDUCTION. *Annu Rev Plant Physiol Plant Mol Biol* **52**: 627-658
- 769 **Schroeder JI, Kwak JM, Allen GJ** (2001) Guard cell abscisic acid signalling and engineering  
770 drought hardiness in plants. *Nature* **410**: 327-330
- 771 **Staiger CJ, Sheahan MB, Khurana P, Wang X, McCurdy DW, Blanchoin L** (2009) Actin  
772 filament dynamics are dominated by rapid growth and severing activity in the  
773 Arabidopsis cortical array. *J Cell Biol* **184**: 269-280
- 774 **Tamura K, Goto C, Hara-Nishimura I** (2015) Recent advances in understanding plant nuclear  
775 envelope proteins involved in nuclear morphology. *J Exp Bot* **66**: 1641-1647
- 776 **Tamura K, Iwabuchi K, Fukao Y, Kondo M, Okamoto K, Ueda H, Nishimura M, Hara-**  
777 **Nishimura I** (2013) Myosin XI-i links the nuclear membrane to the cytoskeleton to  
778 control nuclear movement and shape in Arabidopsis. *Curr Biol* **23**: 1776-1781
- 779 **Uddin MN, Akhter S, Chakraborty R, Baek JH, Cha JY, Park SJ, Kang H, Kim WY, Lee**  
780 **SY, Mackey D, Kim MG** (2017) SDE5, a putative RNA export protein, participates in  
781 plant innate immunity through a flagellin-dependent signaling pathway in Arabidopsis.  
782 *Sci Rep* **7**: 9859
- 783 **Umezawa T, Nakashima K, Miyakawa T, Kuromori T, Tanokura M, Shinozaki K,**  
784 **Yamaguchi-Shinozaki K** (2010) Molecular basis of the core regulatory network in ABA  
785 responses: sensing, signaling and transport. *Plant Cell Physiol* **51**: 1821-1839
- 786 **Verma V, Ravindran P, Kumar PP** (2016) Plant hormone-mediated regulation of stress  
787 responses. *BMC Plant Biol* **16**: 86



- 788 **Wang F, Jia J, Wang Y, Wang W, Chen Y, Liu T, Shang Z** (2014) Hyperpolarization-activated  
789 Ca<sup>2+</sup> channels in guard cell plasma membrane are involved in extracellular ATP-  
790 promoted stomatal opening in *Vicia faba*. *J Plant Physiol* **171**: 1241-1247
- 791 **Wang Y, Chen ZH, Zhang B, Hills A, Blatt MR** (2013) PYR/PYL/RCAR abscisic acid  
792 receptors regulate K<sup>+</sup> and Cl<sup>-</sup> channels through reactive oxygen species-mediated  
793 activation of Ca<sup>2+</sup> channels at the plasma membrane of intact *Arabidopsis* guard cells.  
794 *Plant Physiol* **163**: 566-577
- 795 **Xi W, Liu C, Hou X, Yu H** (2010) MOTHER OF FT AND TFL1 regulates seed germination  
796 through a negative feedback loop modulating ABA signaling in *Arabidopsis*. *Plant Cell*  
797 **22**: 1733-1748
- 798 **Xiao Y, Chen Y, Huang R, Chen J, Wang XC** (2004) Depolymerization of actin cytoskeleton  
799 is involved in stomatal closure-induced by extracellular calmodulin in *Arabidopsis*. *Sci*  
800 *China C Life Sci* **47**: 454-460
- 801 **Yin Y, Adachi Y, Ye W, Hayashi M, Nakamura Y, Kinoshita T, Mori IC, Murata Y** (2013)  
802 Difference in abscisic acid perception mechanisms between closure induction and  
803 opening inhibition of stomata. *Plant Physiol* **163**: 600-610
- 804 **Zhang JF, Yuan LJ, Shao Y, Du W, Yan DW, Lu YT** (2008) The disturbance of small RNA  
805 pathways enhanced abscisic acid response and multiple stress responses in *Arabidopsis*.  
806 *Plant Cell Environ* **31**: 562-574
- 807 **Zhang W, He SY, Assmann SM** (2008) The plant innate immunity response in stomatal guard  
808 cells invokes G-protein-dependent ion channel regulation. *Plant J* **56**: 984-996
- 809 **Zhao S, Jiang Y, Zhao Y, Huang S, Yuan M, Guo Y** (2016) CASEIN KINASE1-LIKE  
810 PROTEIN2 Regulates Actin Filament Stability and Stomatal Closure via Phosphorylation  
811 of Actin Depolymerizing Factor. *Plant Cell* **28**: 1422-1439
- 812 **Zhao Y, Zhao S, Mao T, Qu X, Cao W, Zhang L, Zhang W, He L, Li S, Ren S, Zhao J, Zhu**  
813 **G, Huang S, Ye K, Yuan M, Guo Y** (2011) The plant-specific actin binding protein  
814 SCAB1 stabilizes actin filaments and regulates stomatal movement in *Arabidopsis*. *Plant*  
815 *Cell* **23**: 2314-2330
- 816 **Zhou X, Graumann K, Evans DE, Meier I** (2012) Novel plant SUN-KASH bridges are  
817 involved in RanGAP anchoring and nuclear shape determination. *J Cell Biol* **196**: 203-  
818 211
- 819 **Zhou X, Graumann K, Wirthmueller L, Jones JD, Meier I** (2014) Identification of unique  
820 SUN-interacting nuclear envelope proteins with diverse functions in plants. *J Cell Biol*  
821 **205**: 677-692
- 822 **Zhou X, Groves NR, Meier I** (2015) SUN anchors pollen WIP-WIT complexes at the  
823 vegetative nuclear envelope and is necessary for pollen tube targeting and fertility. *J Exp*  
824 *Bot* **66**: 7299-7307
- 825 **Zhou X, Meier I** (2013) How plants LINC the SUN to KASH. *Nucleus* **4**: 206-215
- 826 **Zou JJ, Li XD, Ratnasekera D, Wang C, Liu WX, Song LF, Zhang WZ, Wu WH** (2015)  
827 *Arabidopsis* CALCIUM-DEPENDENT PROTEIN KINASE8 and CATALASE3  
828 Function in Abscisic Acid-Mediated Signaling and H<sub>2</sub>O<sub>2</sub> Homeostasis in Stomatal Guard  
829 Cells under Drought Stress. *Plant Cell* **27**: 1445-1460
- 830

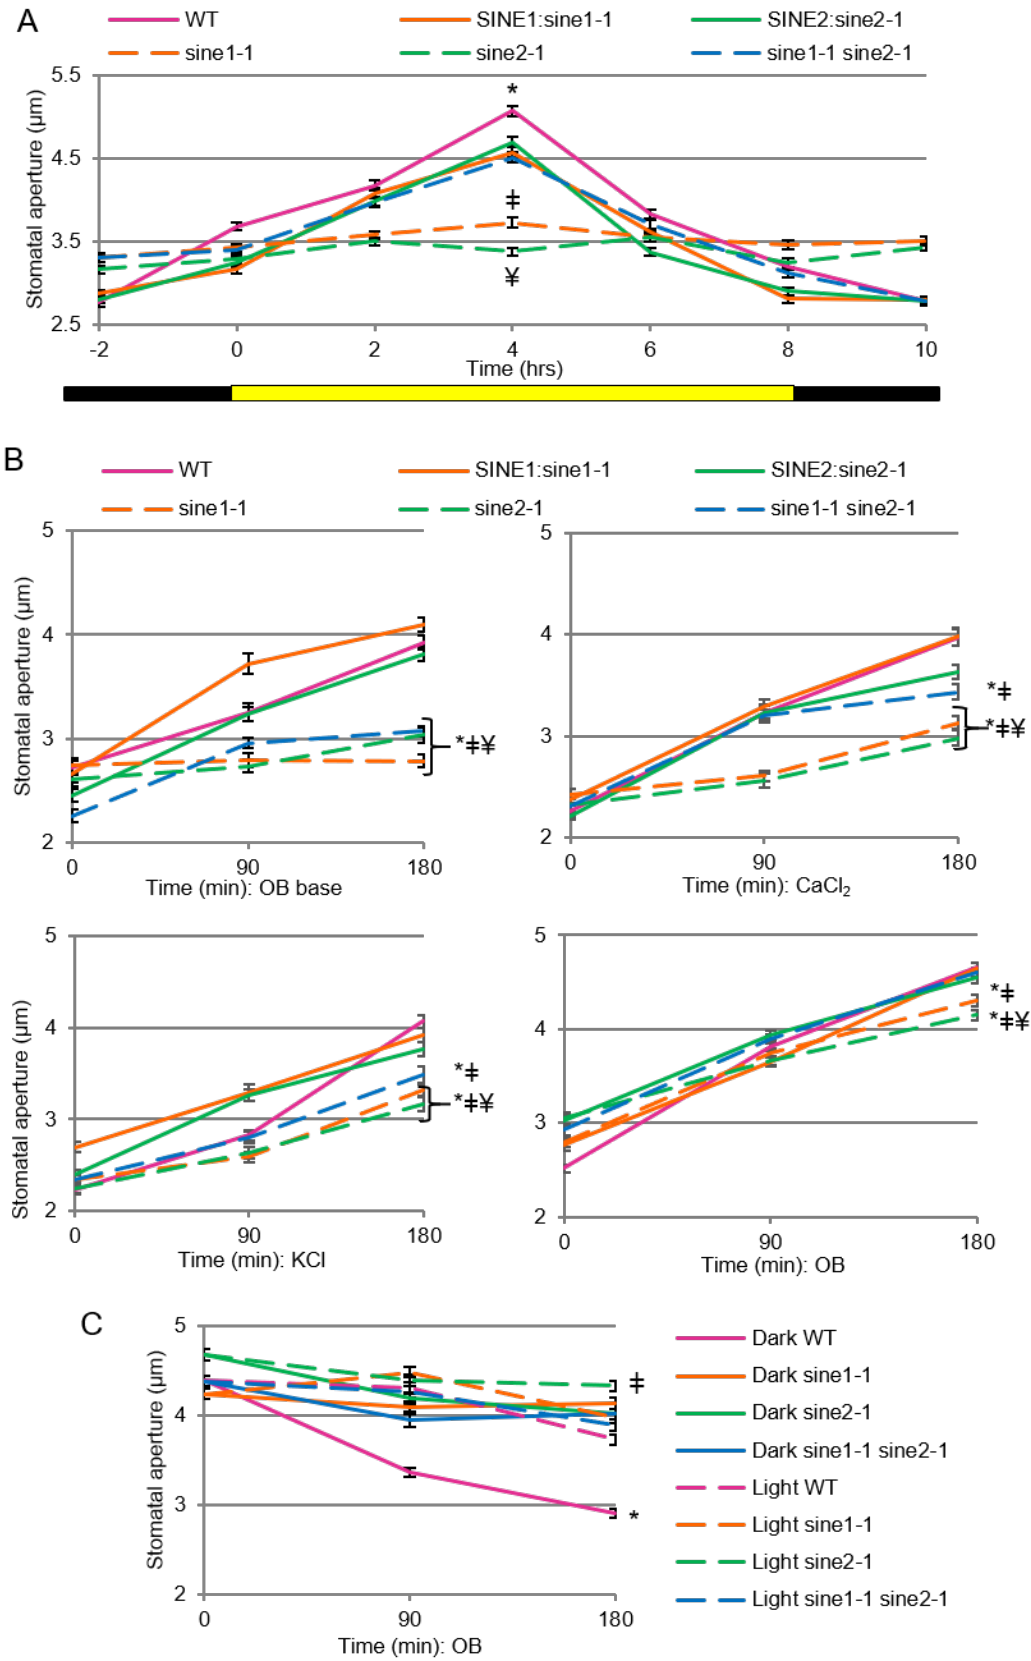

831  
832 Figure 1



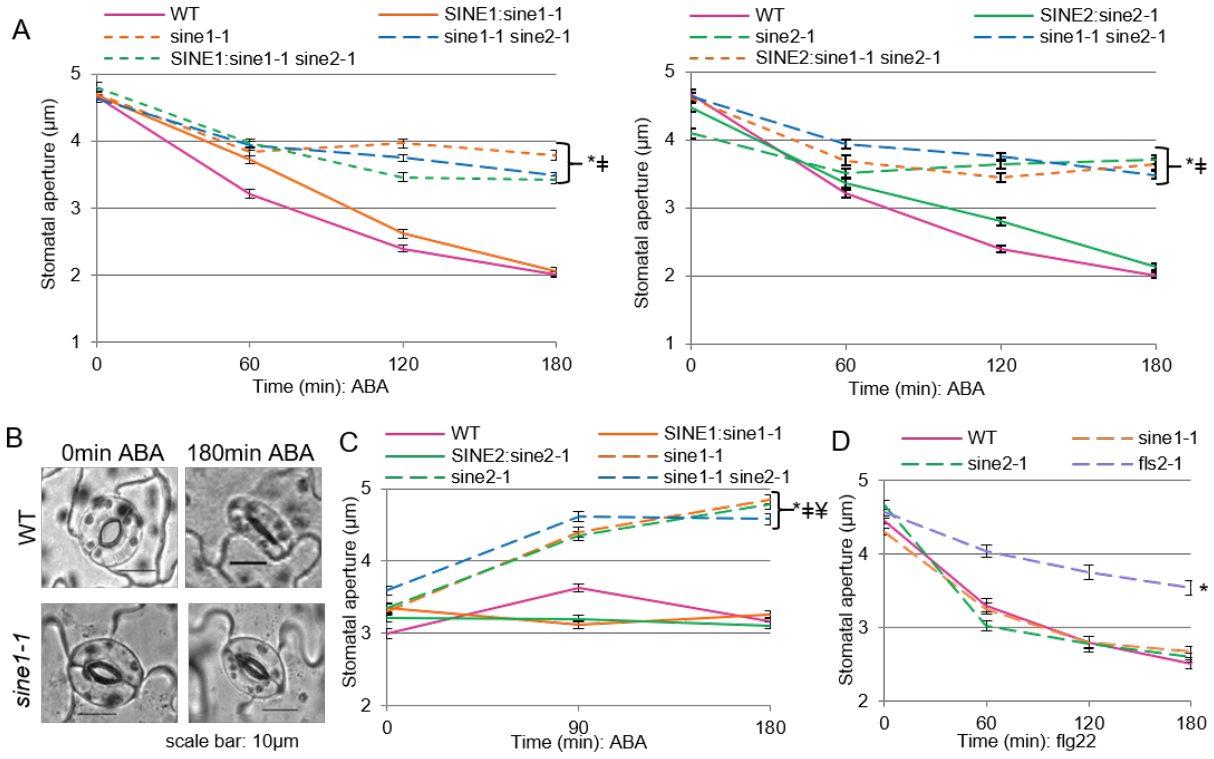

833  
834  
835

Figure 2

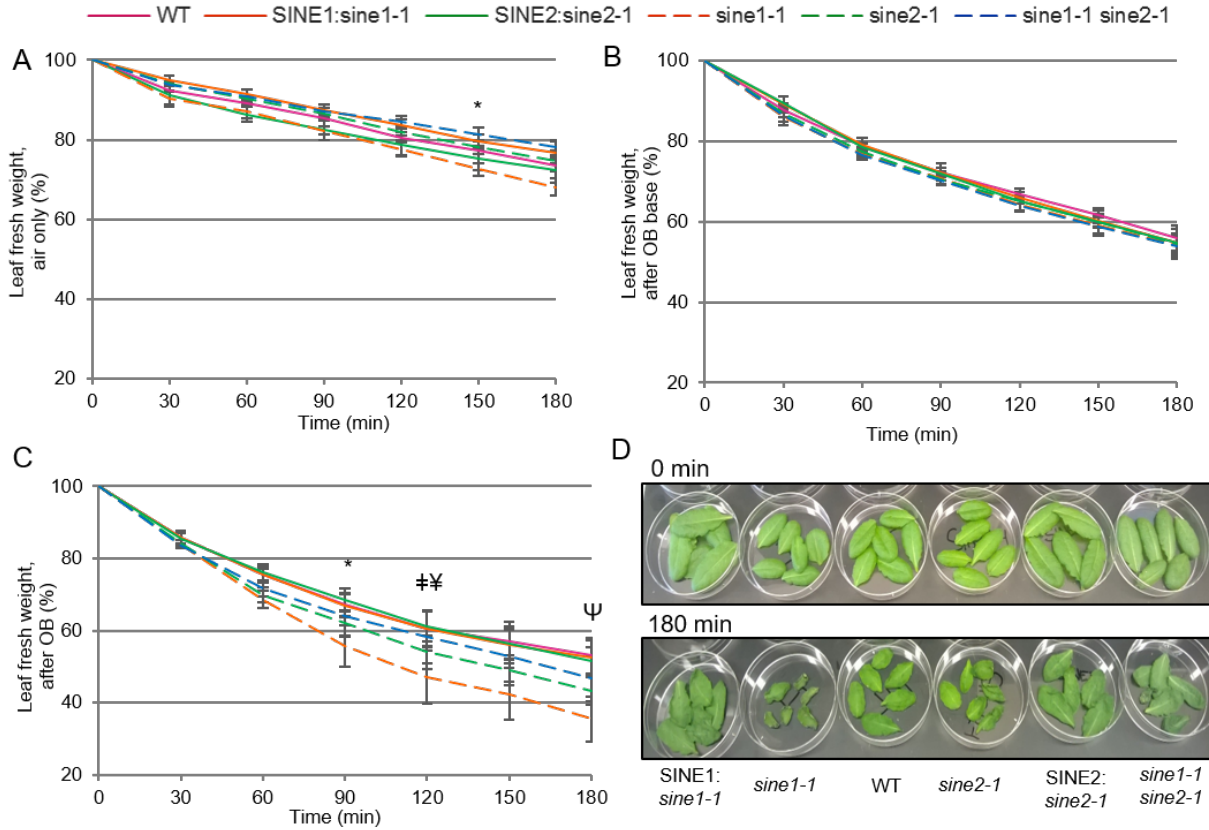

836  
837  
838

Figure 3

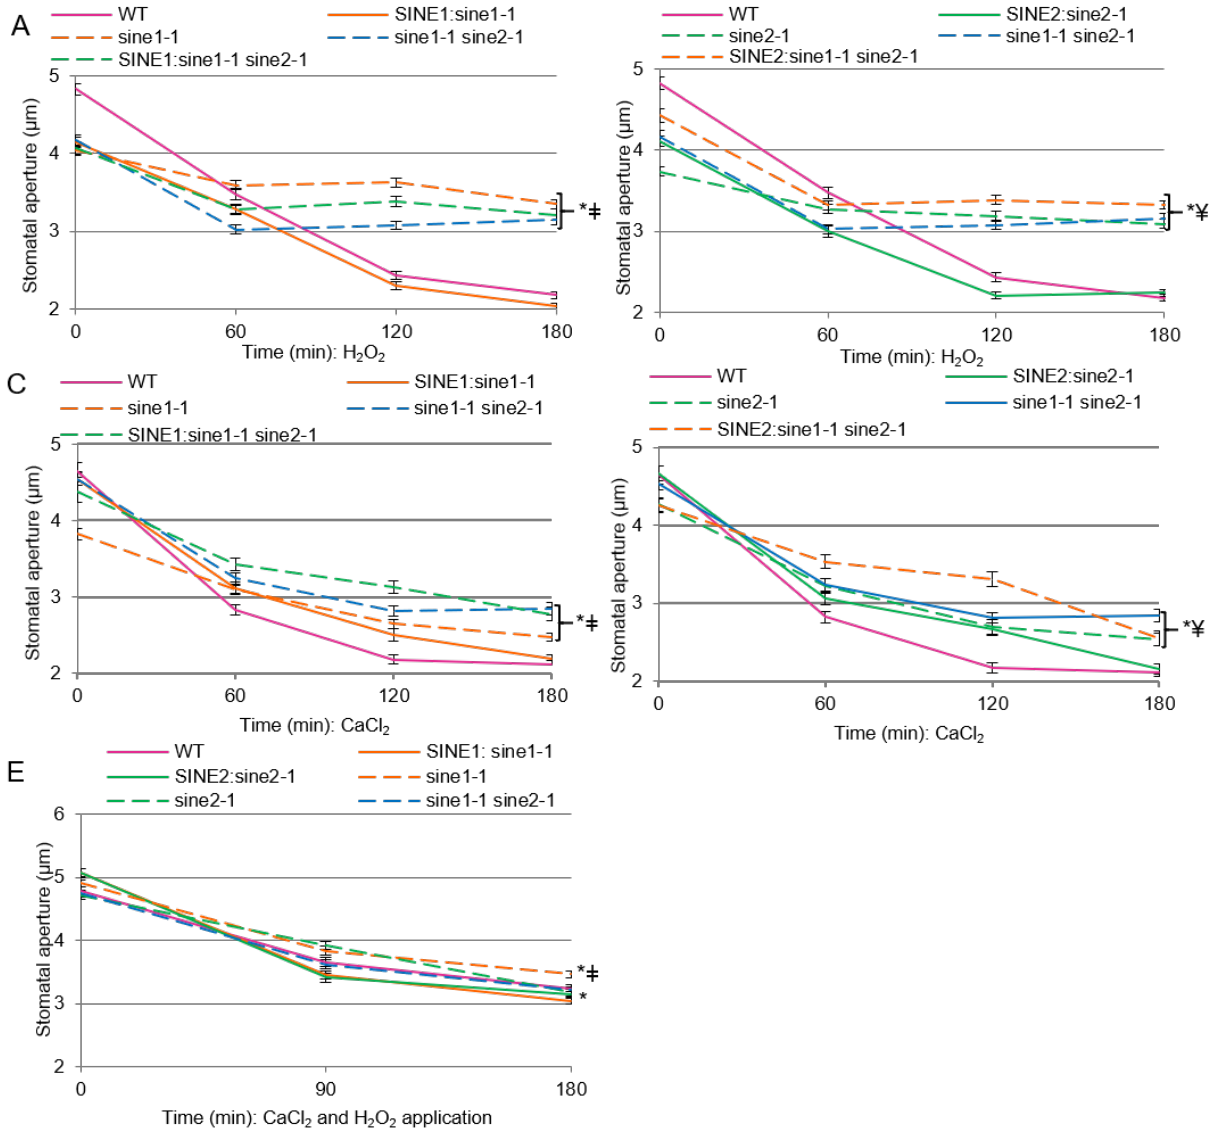

839

840

841 Figure 4

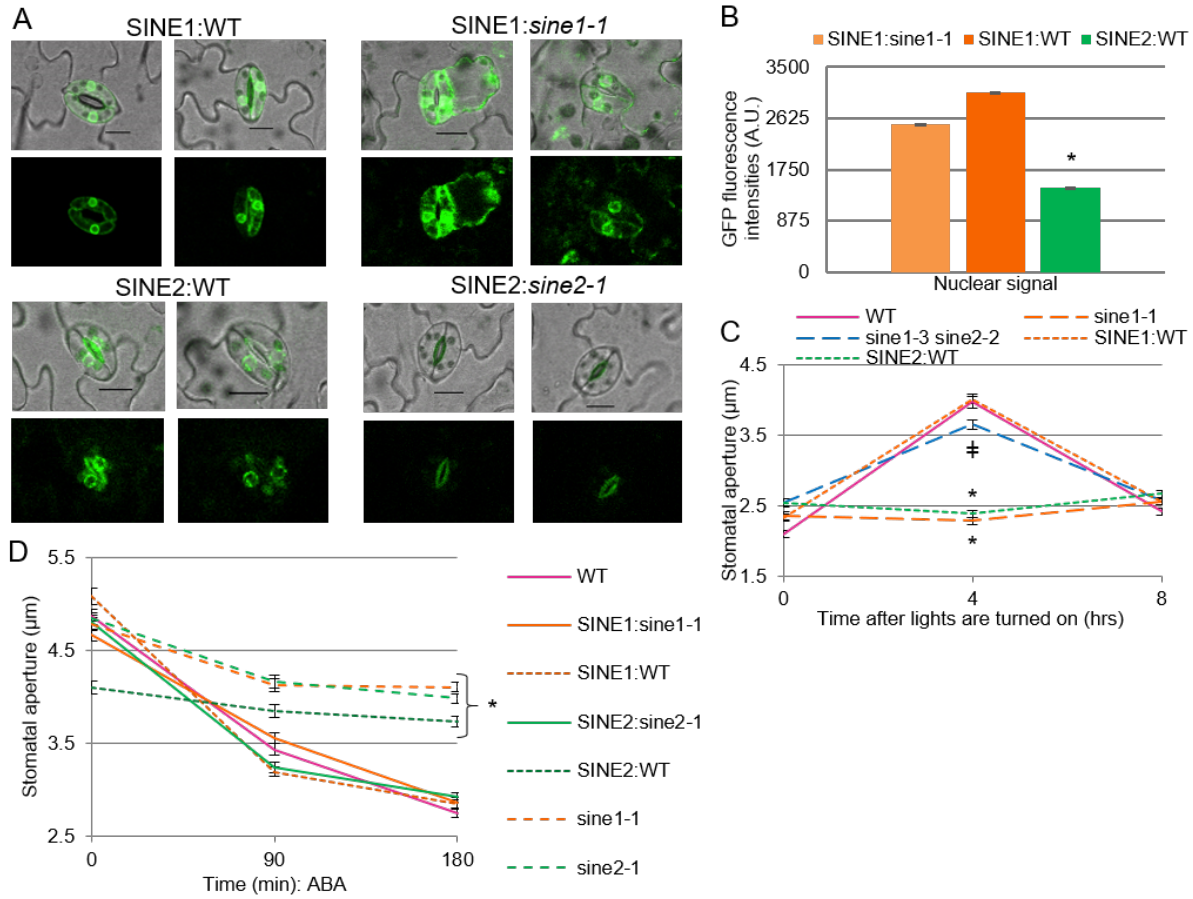

842  
843  
844  
845

Figure 5

846

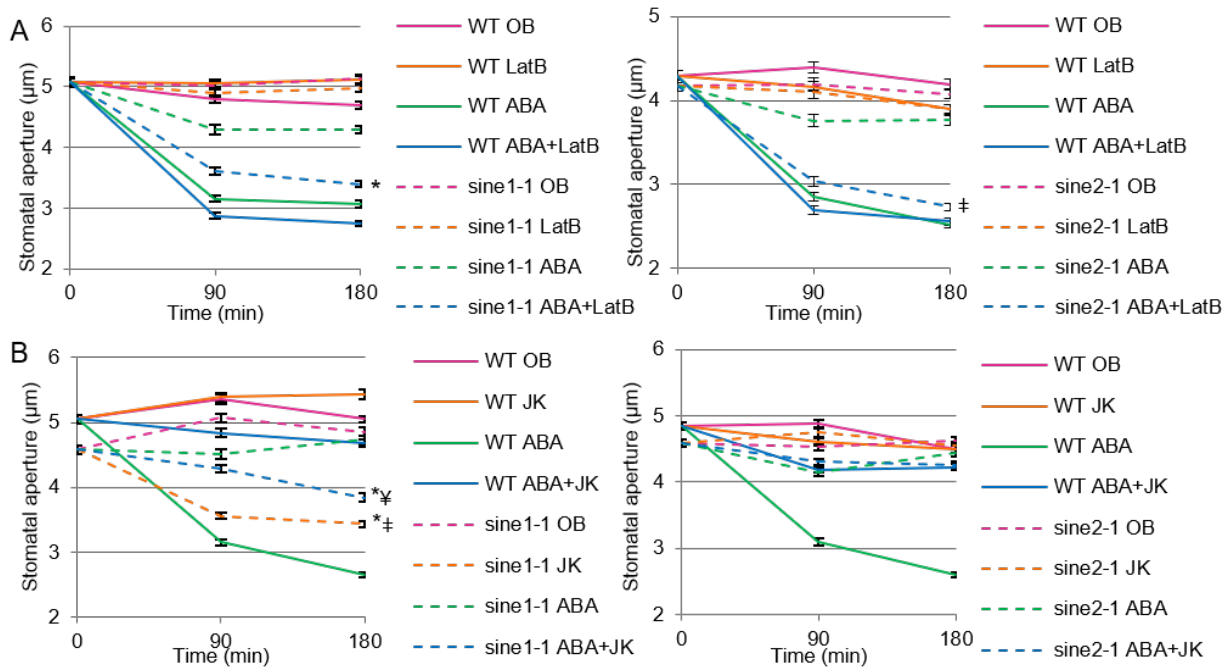

847

848

849

Figure 6
